# Supplementary material for: Endeavoring the First Lanthanide–Carbon Triple-Bond in Fullerene Cage
Source: Research Square preprint supplement (doi:10.21203/rs.3.rs-5351349/v1), 2024-11-13
Supplement: Supplementary file 1 [file f0f8ae7971070c7e3fa0253d.docx]

# Endeavoring the First Lanthanide-Carbon Triple-Bond in Fullerene Cage

Hongjie Jiang1†, Jing Zhao2,3†, Qingyu Meng1, Xiao-Kun Zhao2, Min Guo1, Han-Shi Hu3, Jun Li2,3,4*, Ning Chen1*

**Affiliations**

1College of Chemistry, Chemical Engineering and Materials Science & State Key Laboratory of Radiation Medicine and Protection, Soochow University, Suzhou 215123, China.

2Department of Chemistry and Guangdong Provincial Key Laboratory of Catalytic Chemistry, Southern University of Science and Technology, Shenzhen 518055, China.

3Department of Chemistry and Engineering Research Center of Advanced Rare-Earth Materials of the Ministry of Education, Tsinghua University, Beijing 100084, China.

4Fundamental Science Center of Rare Earths, Ganjiang Innovation Academy, Chinese Academy of Sciences, Ganzhou 341000, China

†These authors contributed equally to this work.

*Corresponding author email: chenning@suda.edu.cn (N. C.); junli@tsinghua.edu.cn (J. L.)

## Supplementary Figures


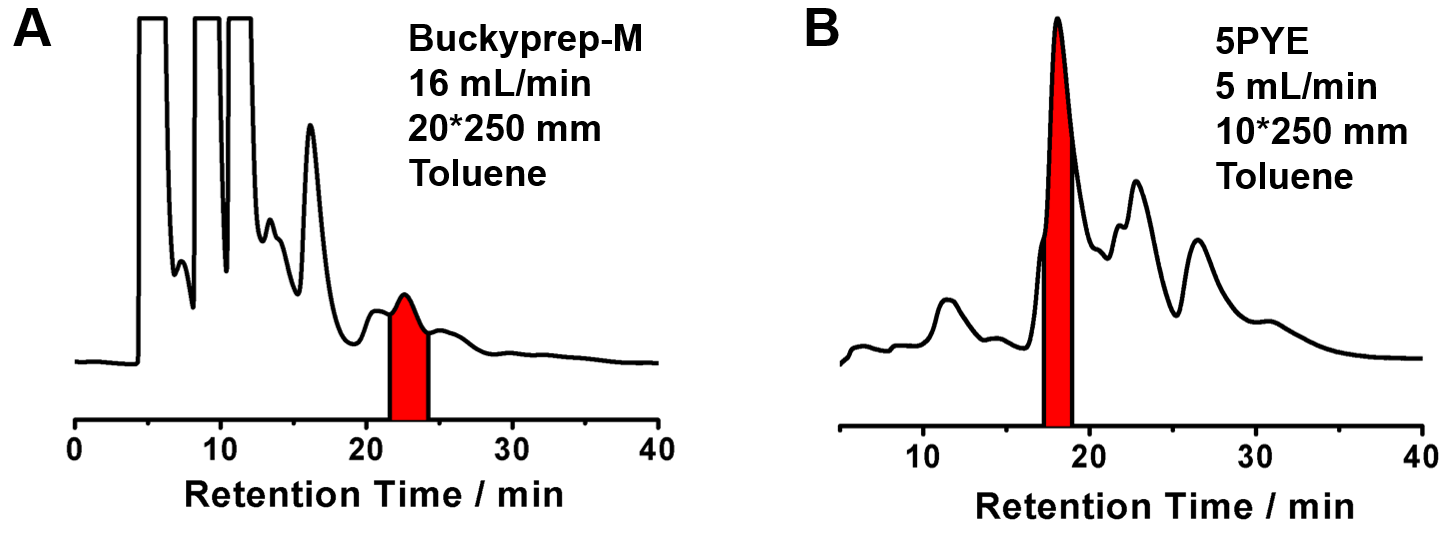


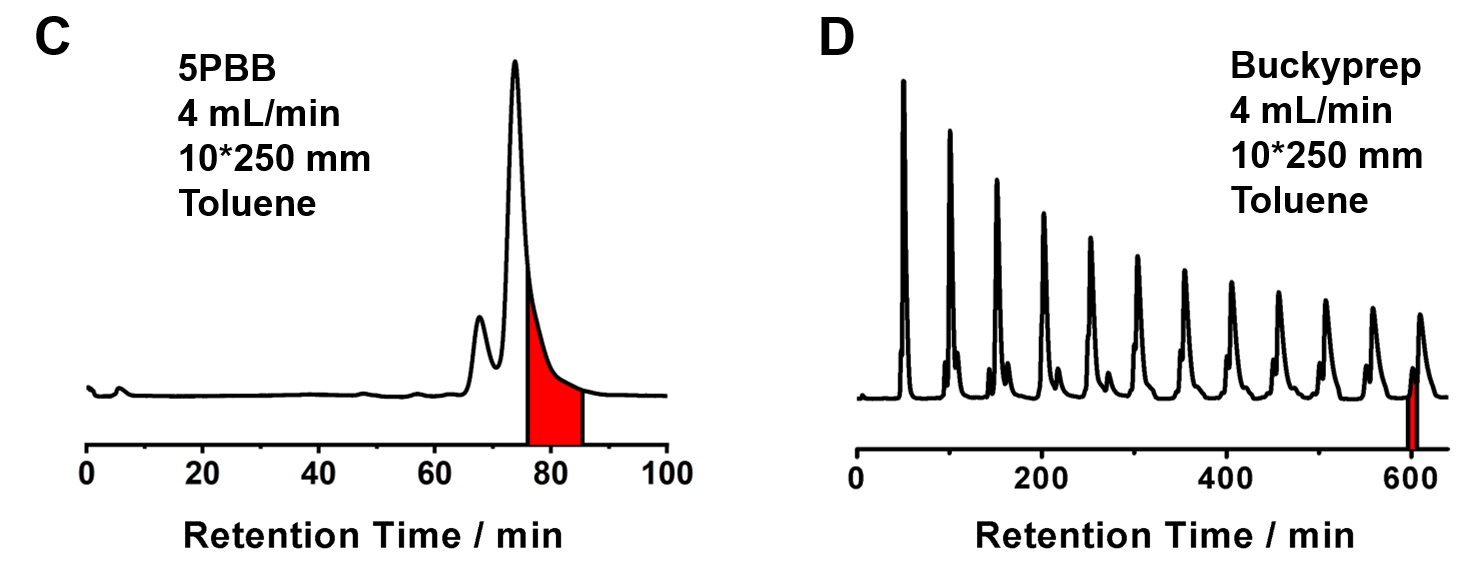


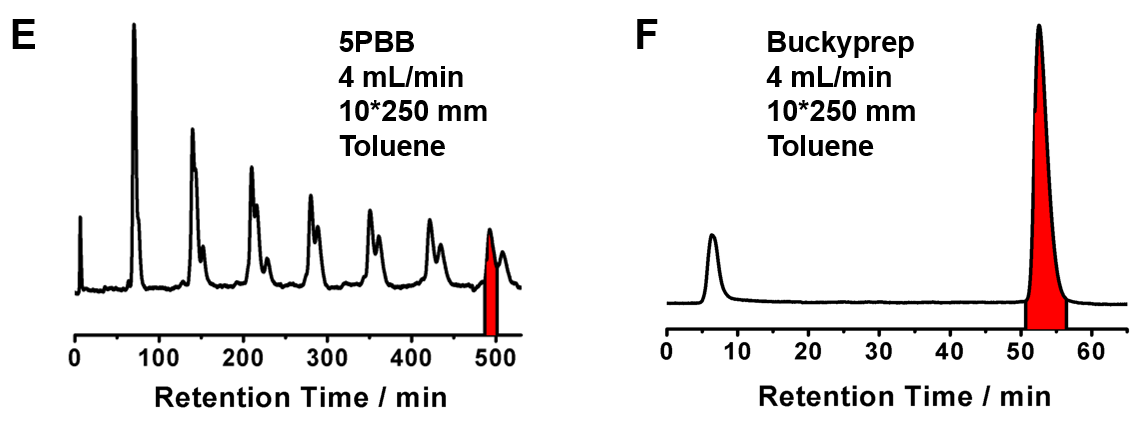


**Supplementary Figure 1. HPLC isolation scheme of CeSc2C@C80. (A)** The first-step HPLC chromatogram of the extracted fullerene mixture containing CeSc2C@C80. (condition: 20×250 mm semi-preparative Buckyprep-M column; flow rate 4.0 mL/min; toluene as eluent); **(B)** The second-step HPLC chromatogram of the collected fraction (21.5-24.5 min, highlighted as red) from the first step (condition: 10×250 mm semi-preparative 5PYE column; flow rate 5.0 mL/min; toluene as eluent); **(C)** The third-step HPLC chromatogram of the collected fraction (17.5-19.5 min, highlighted as red) from the second step (condition: 10×250 mm semi-preparative 5PBB column; flow rate 4.0 mL/min; toluene as eluent); **(D)** The fourth-step HPLC chromatogram of the collected fraction (76-85 min, highlighted as red) from the third step (condition: 10×250 mm semi-preparative Buckyprep column; flow rate 4.0 mL/min; toluene as eluent). **(E)** The fifth-step HPLC chromatogram in recycling mode of the collected fraction (595-620 min, highlighted as red) from the fourth step (condition: 10×250 mm semi-preparative 5PBB column; flow rate 4.0 mL/min; toluene as eluent). **(F)** The final-step HPLC chromatogram of the collected fraction (483-502 min, highlighted as red) from the fifth step (condition: 10×250 mm semi-preparative Buckyprep column; flow rate 4.0 mL/min; toluene as eluent). The highlighted single peak containing isolated CeSc2C@C80 was collected.


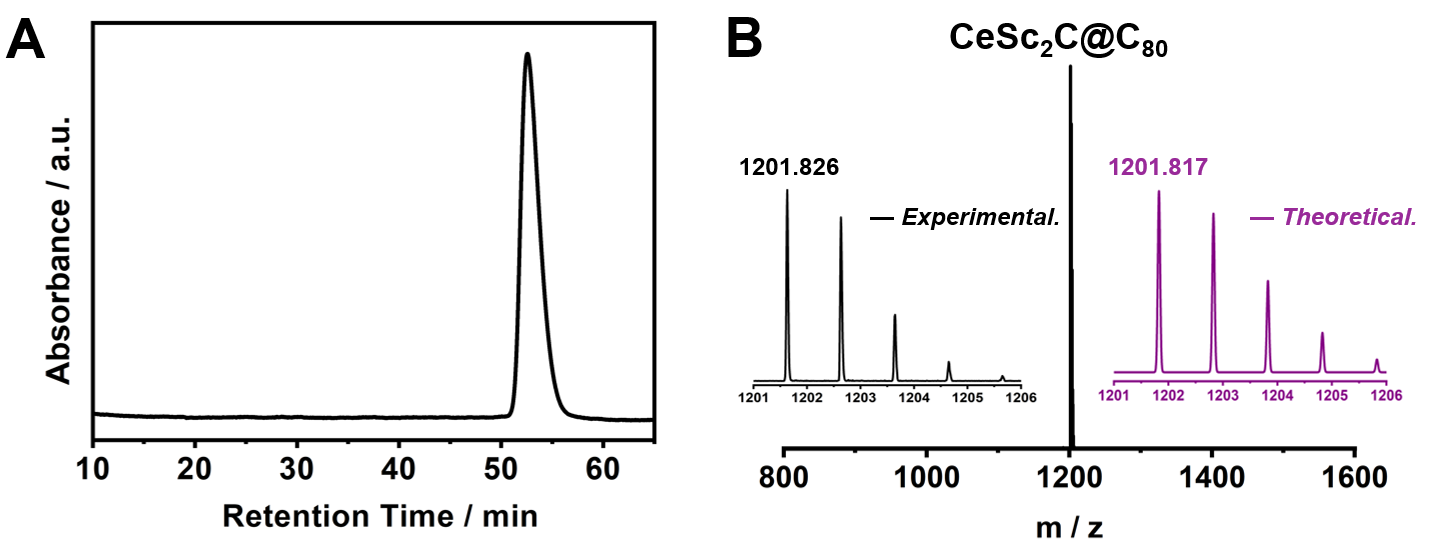


**Supplementary Figure 2. HPLC chromatograms and mass spectra of purified CeCSc2@C80. (A)** HPLC chromatograms of purified CeCSc2@C80 on a 10×250 mm semi-preparative Buckyprep column with a 4 mL/min flow rate using toluene as the eluent. **(B)** Positive-ion mode MALDI-TOF mass spectrum of purified CeCSc2@C80. The inserts show the corresponding experimental and theoretical isotopic distributions, both in good agreement.


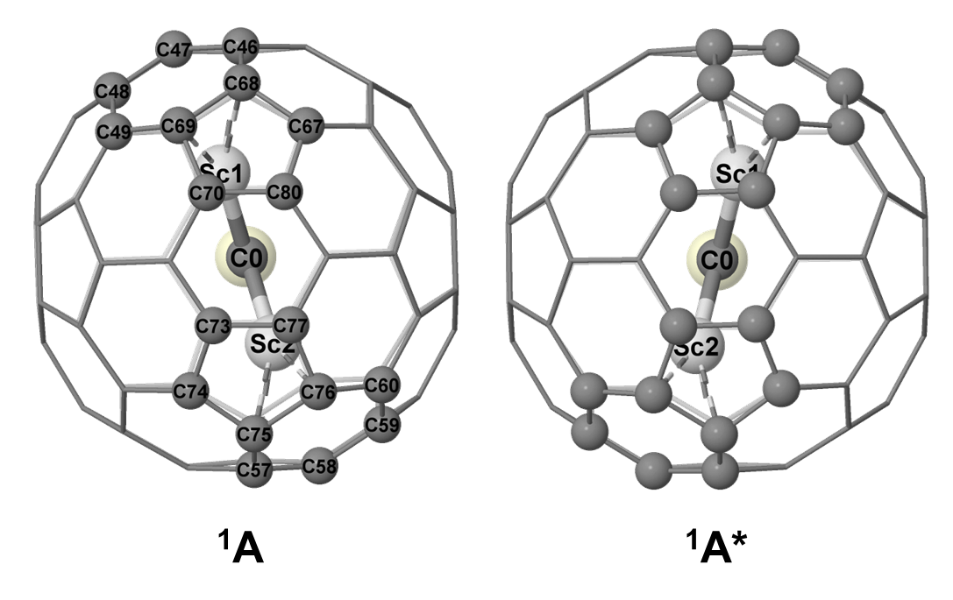


**Supplementary Figure 3.**  **The view from Sc1–C–Sc2 of 1A CeCSc2@C80 which is consistent with experimental observations, along with its symmetrical counterpart 1A*.**


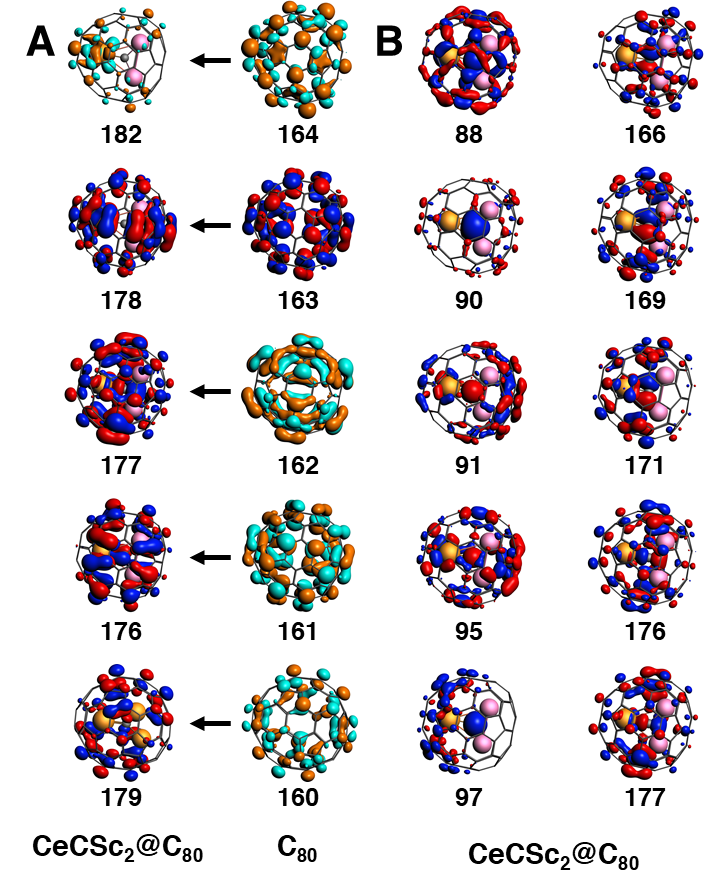


**Supplementary Figure 4.** **Canonical molecular orbitals of CeCSc2@C80 at the PBE level**; Occupied orbitals are indicated with blue and red colors, while unoccupied orbitals are marked with orange and cyan colors. (a) MOs related to LUMO and HOMOs of fullerene C80 (isosurface: 0.02 a.u.); (b) Other MOs with larger contributions from the central CeCSc2 cluster (isosurface: 0.03 a.u.).


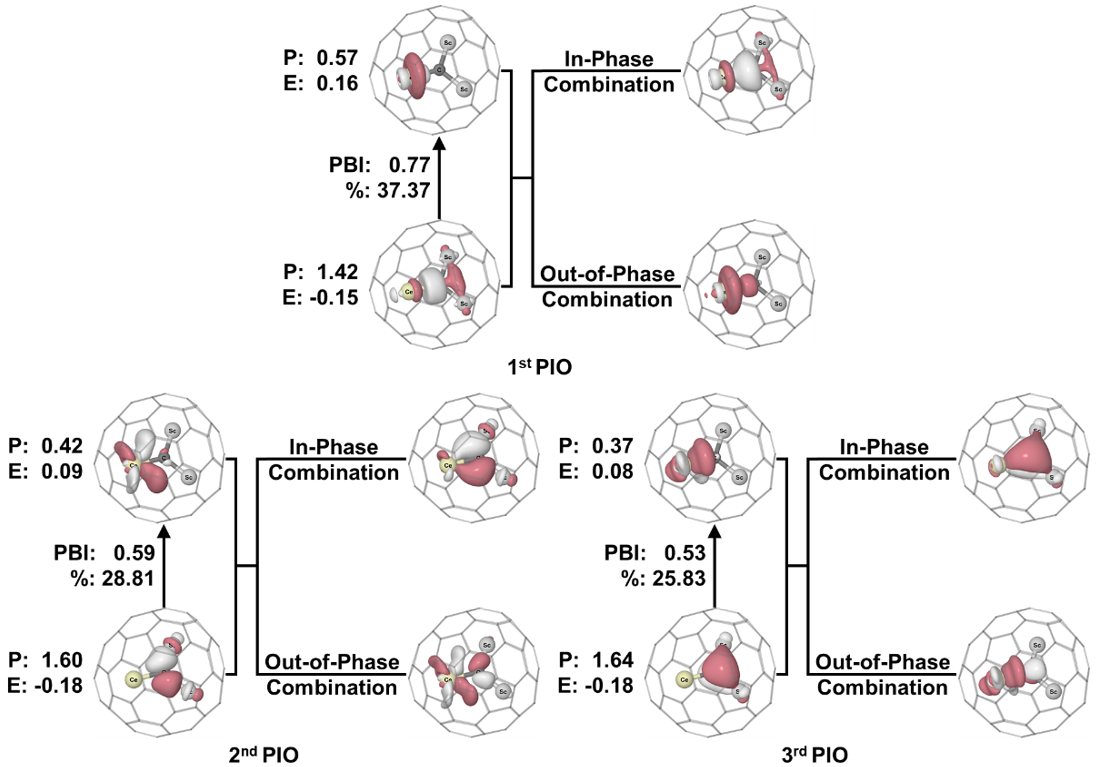


**Supplementary Figure 5**. **PIO pair and PIMO pairs of PIO analysis on CeCSc2@C80**: Ce and CSc2 as two fragments based on the calculations at B3LYP/6-31G*+SDD level. The orbital energies and populations (occupation numbers) are given as E and P, respectively, near each PIO. Given between each PIO pair are the PIO-based bond indices (abbreviated as PBI) and its contribution (as %) to the total interactions between two fragments (the contributions of all PIOs sum up to 100%). Isovalue: 0.05 a.u. for all orbitals.


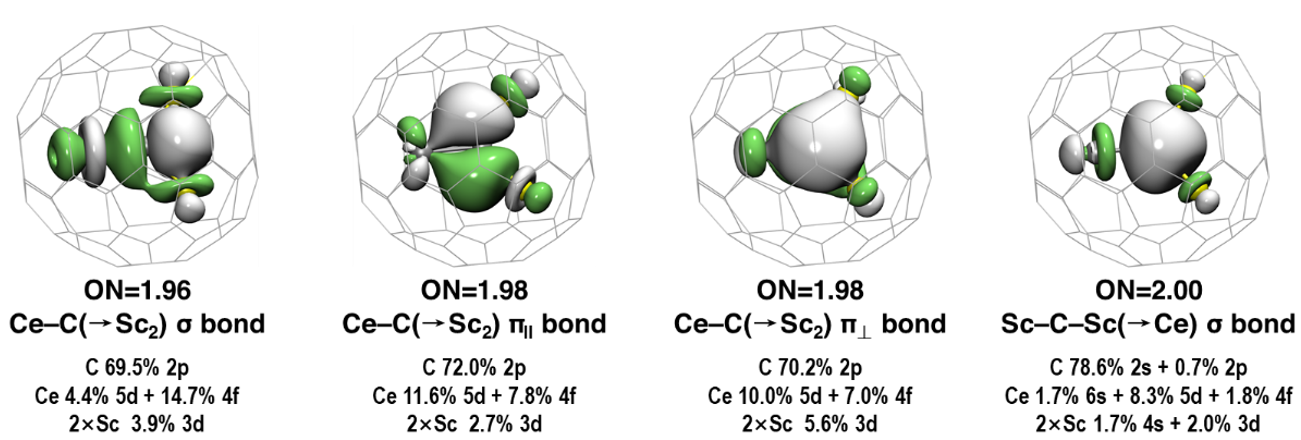


**Supplementary Figure 6. AdNDP analysis of the four 4-center 2-electron (4c-2e) bonds of CeCSc2@C80 at B3LYP/6-31G*+SDD.**


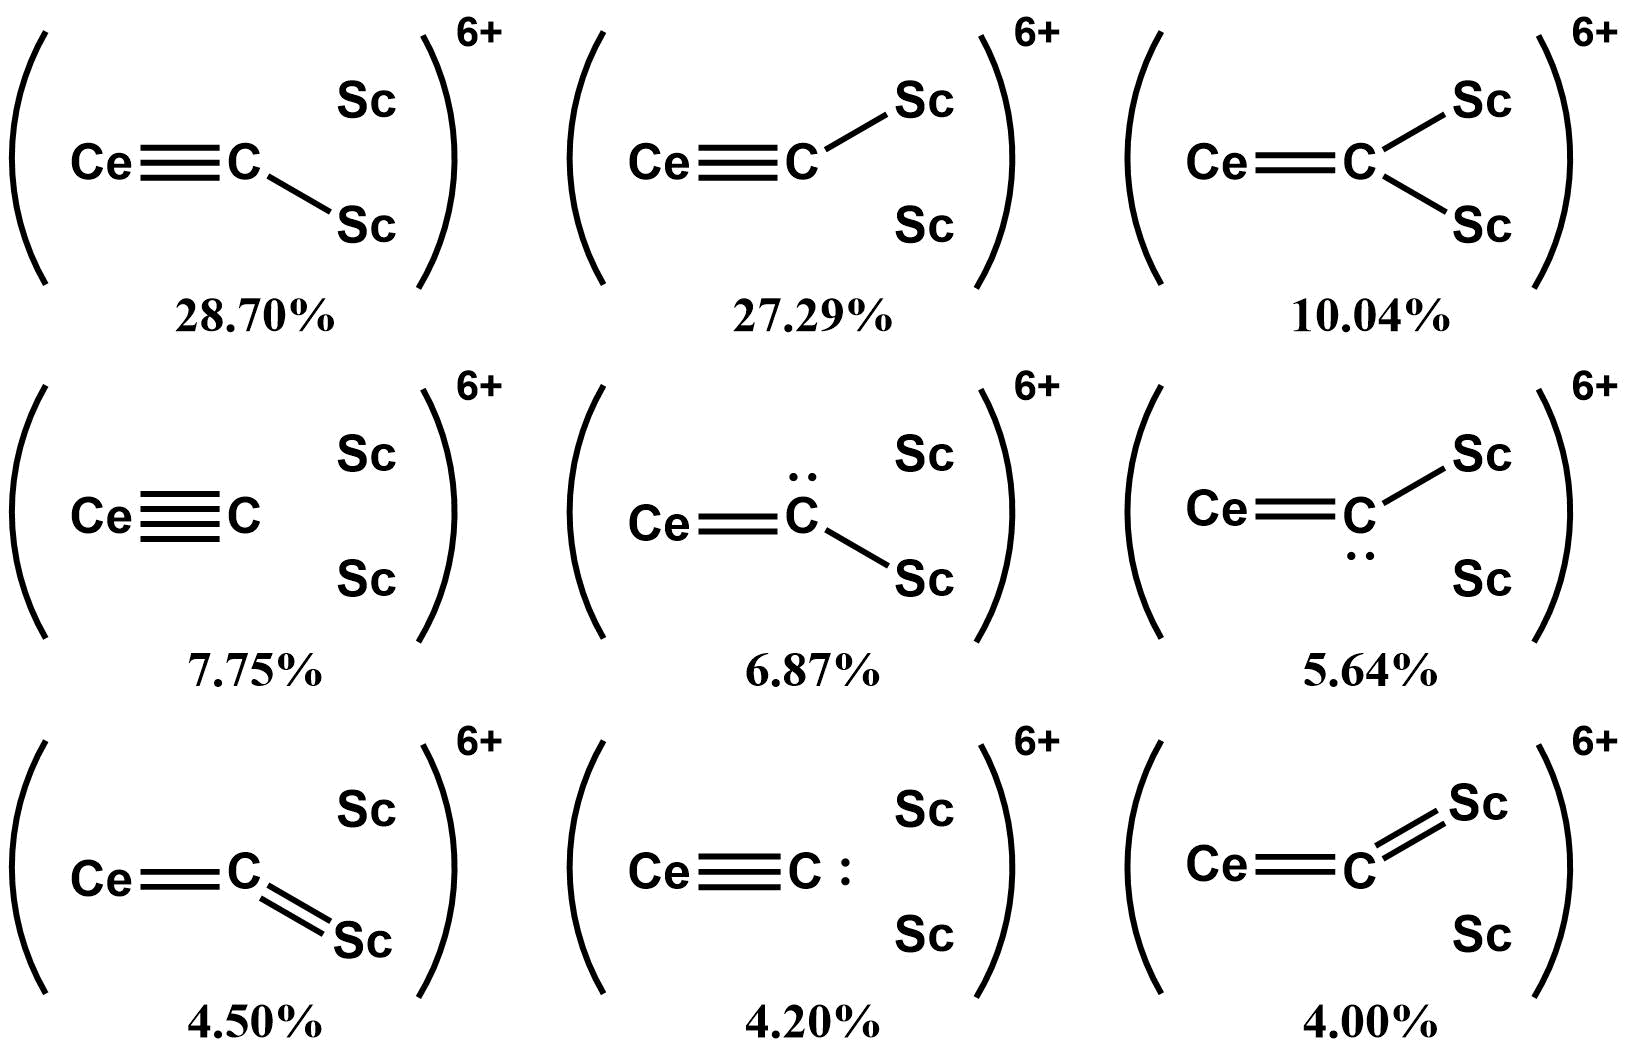


**Supplementary Figure 7**. Natural resonance analysis results of CeCSc2 with contributions greater than 1% in CeSc2C@C80 at B3LYP/6-31G*+SDD level.


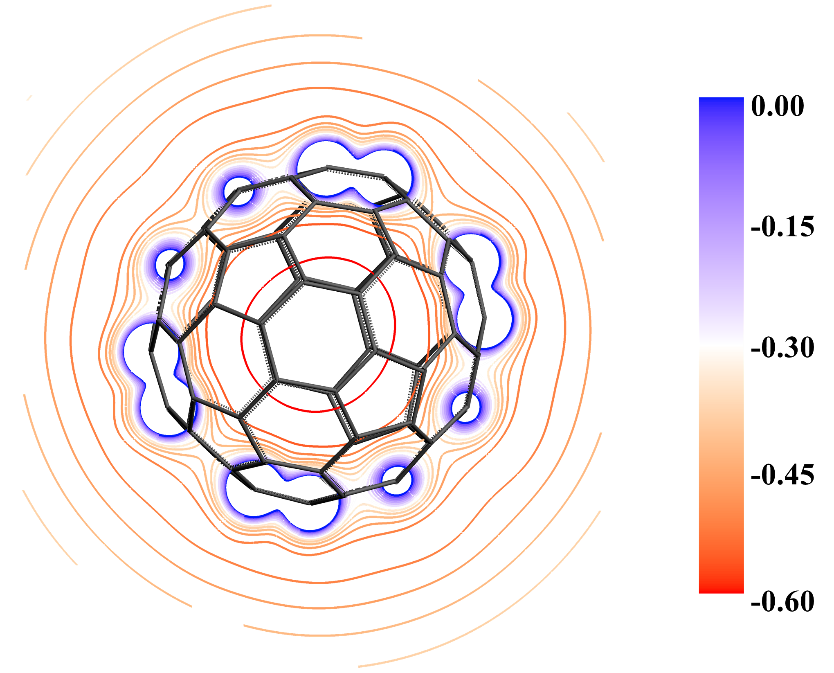


**Supplementary Figure 8.** Contour lines of electrostatic potential of [C80]6− on the symmetric plane defined by C15, C16 and C47 at PBE level.


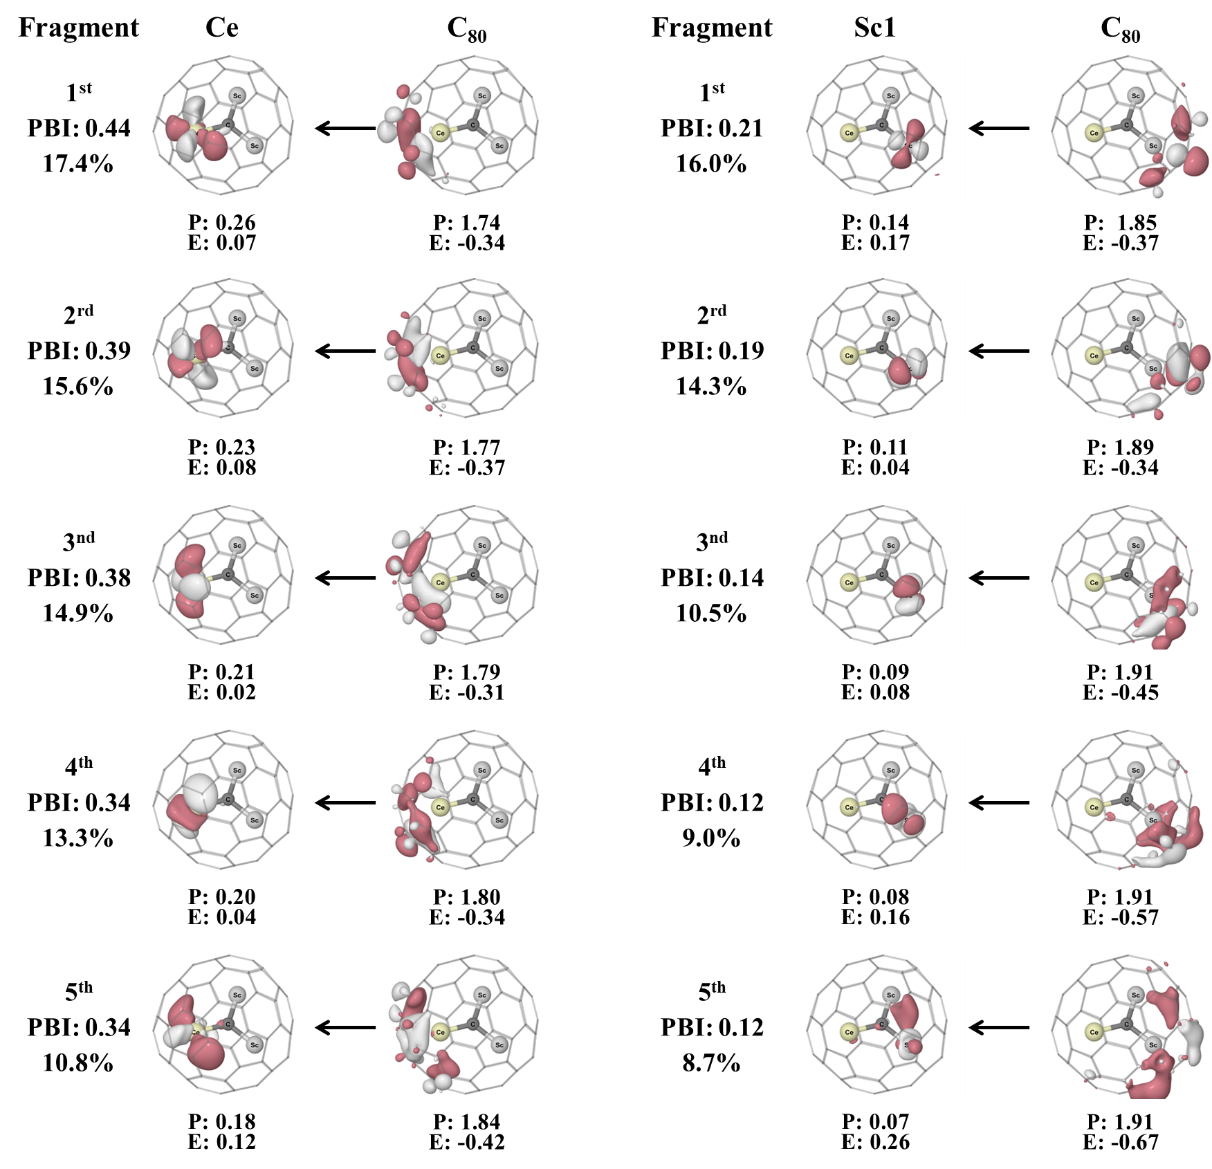


**Supplementary Figure 9.** **Principal interacting orbitals (PIOs) of CeCSc2@C80 between the metal atoms and the C80 cage.** The PIO bond indices (PBI) and contribution (in %) are obtained from Kohn-Sham B3LYP calculations. The energies (in a.u.) and populations (occupation numbers) of the PIOs (isovalues: ±0.05 a.u.) are abbreviated as E and P, respectively. Since the positions of the two Sc atoms are symmetrical, for simplicity, only the interaction analysis between one Sc atom and C80 was performed. Only the first five major interactions are listed in the figure.


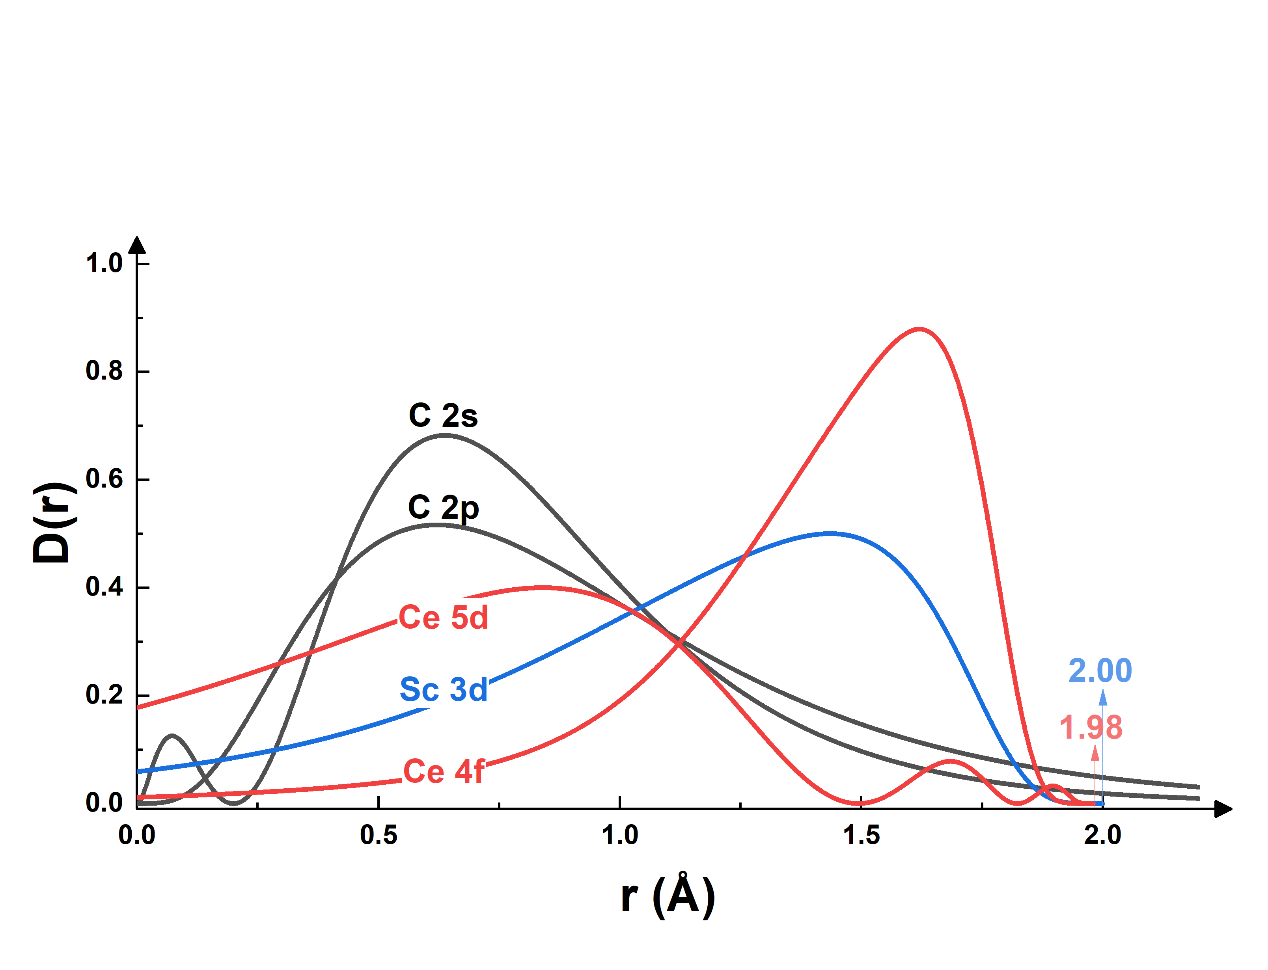


**Supplementary Figure 10**. Radial distribution function *D*(*r*) = *r*2*R*(*r*)2 of Ce 4f/5d, Sc 3d, and C 2s/2p AOs at the experimental bond length (Ce–C = 1.98 Å; Sc–C = 2.00 Å) from the calculation at PBE/TZ2P level.

**Supplementary Figure 11**. ORTEP-style illustration with probability ellipsoids for CeCSc2@*Ih*(7)-C80.

## Supplementary Tables

**Supplementary Table 1.** **Crystallographic information of CeSc2C@*Ih*(7)-C80 cocrystals.**

| Crystal | CeSc2C@*Ih*(7)-C80·  [NiII(OEP)]·2C6H6 | Z | 4 |
| --- | --- | --- | --- |
| Formula | C129 H56 Ce N4 Ni Sc2 | ρ, g cm-3 | 1.732 |
| Formula weight | 1950.52 | θ, deg | 2.25 –74.58 |
| F(000) | 3944 | μ(GaK) (mm-1) | 6.940 |
| Crystal size, mm3 | 0.12 × 0.08 × 0.03 | T, K | 120(2) |
| Bravais lattice | monoclinic | Radiation (λ, mm-1) | 1.54178 |
| Space group | *C*2*/m* (No. 12) | R1(all data) | 0.1006 |
| a, Å | 25.2433(6) | wR2(all data) | 0.2530 |
| b, Å | 15.0739(4) | Parameters | 974 |
| c, Å | 19.7436(5) | reflections (I > 2.0σ(I)) | 1051 |
| α, deg | 90 | R1 (observed data) | 0.0936 |
| β, deg | 95.3560(10) | wR2(observed data) | 0.2468 |
| γ, deg | 90 | Goodness-of-fit indicator | 1.071 |
| Volume, Å3 | 7479.9(3) | Maximum residual electron density, e Å-3 | 1.778 |

**Supplementary Table 2. Occupancies of different metal atoms in the cluster.**

| Metal Sites | Sc1/Sc1A | Sc2/Sc2A | Sc3/Sc3A | Sc4/Sc4A |
| --- | --- | --- | --- | --- |
| Occupancy | 0.435(4) | 0.324(7) | 0.176(7) | 0.065(4) |
| Metal Sites | Ce1/Ce1A | Ce2/Ce2A | Ce3/Ce3A | / |
| Occupancy | 0.4035(15) | 0.0379(10) | 0.0585(10) | / |

**Supplementary Table 3.** Comparison of geometric parameters between the central cluster and fullerene of CeCSc2@C80 from PBE/TZ2P+DZP calculations and experiments.

| Distance | Exp. | Cal. | Distance | Exp. | Cal. | Distance | Exp. | Cal. |
| --- | --- | --- | --- | --- | --- | --- | --- | --- |
| C2–Ce | 2.478 | 2.569 | C68–Sc1 | 2.166 | 2.229 | C75–Sc2 | 2.205 | 2.230 |
| C1–Ce | 2.492 | 2.576 | C46–Sc1 | 2.251 | 2.363 | C76–Sc2 | 2.278 | 2.238 |
| C3–Ce | 2.560 | 2.571 | C69–Sc1 | 2.279 | 2.239 | C57–Sc2 | 2.357 | 2.364 |
| C6–Ce | 2.574 | 2.572 | C47–Sc1 | 2.441 | 2.518 | C60–Sc2 | 2.460 | 2.382 |
| C5–Ce | 2.585 | 2.572 | C67–Sc1 | 2.469 | 2.488 | C74–Sc2 | 2.484 | 2.493 |
| C4–Ce | 2.619 | 2.576 | C49–Sc1 | 2.491 | 2.386 | C58–Sc2 | 2.546 | 2.503 |
|  |  |  | C48–Sc1 | 2.540 | 2.528 | C77–Sc2 | 2.565 | 2.515 |
|  |  |  | C70–Sc1 | 2.619 | 2.503 | C59–Sc2 | 2.568 | 2.524 |
| Average | 2.551 | 2.573 | Average | 2.407 | 2.407 | Average | 2.433 | 2.406 |

**Supplementary Table 4**. Comparisons of the central cluster CeCSc2 structure between the experimental data and optimized results of CeSc2C@C80 using PBE with different spin multiplicities at PBE/TZ2P+DZP level.

|  |  | Exp | 1A | 1A**a* | 3A | 5A | 7A |
| --- | --- | --- | --- | --- | --- | --- | --- |
| ΔE/kcal·mol-1 |  | / | -0- | -0- | 26.65 | 63.56 | 105.03 |
| Distances/Å | Ce–C | 1.978 | **2.084** | **2.084** | 2.143 | 2.126 | 2.147 |
| Sc1–C | 2.010 | 2.002 | 2.002 | 1.996 | 2.042 | 2.098 |
| Sc2–C | 2.035 | 2.003 | 2.003 | 1.994 | 2.043 | 2.079 |
| Angles/° | Ce–C–Sc1 | 127.7 | 125.0 | 124.7 | 122.1 | 124.8 | 116.8 |
| Ce–C–Sc2 | 121.9 | 124.8 | 124.9 | 124.5 | 124.9 | 121.7 |
| Sc1–C–Sc2 | 109.9 | 110.2 | 110.3 | 109.7 | 102.5 | 100.9 |
| Dihedral Angle/° | Sc1–C–Sc2–Ce | 172.4 | 179.7 | 179.7 | -159.0 | 150.1 | 131.2 |

*a* 1A* is the chiral isomer of 1A structure due to approximate *C*2 symmetry of CeSc2C@C80.

**Supplementary Table 5**. Relative energy differences (kcal/mol) between singlet and triplet state of CeCSc2@C80 obtained through PBE, B3LYP and PBE0 optimizations.

| State | PBE | B3LYP | PBE0 |
| --- | --- | --- | --- |
| 1A | -0- | -0- | -0- |
| 1A* | -0- | -0- | -0- |
| 3A | 26.58 | 13.91 | 12.65 |

**Supplementary Table 6**. The contribution (%) of corresponding valence atomic orbital from the central cluster [CeCSc2]6+ to the Kohn-Sham canonical MOs at the PBE/TZ2P+DZP level.

| No. | C 2s | C 2p | Sc 3d | Sc 4s | Ce 4f | Ce 5d | Ce 6s |
| --- | --- | --- | --- | --- | --- | --- | --- |
| 88 | 7.12 |  |  | 2.37 |  |  |  |
| 90 | 36.01 |  |  | 9.48 |  | 2.26 | 1.63 |
| 91 | 7.71 |  |  |  |  |  | 2.99 |
| 95 | 4.45 |  |  |  |  |  | 1.18 |
| 97 | 11.54 | 1.96 |  |  |  | 4.36 |  |
| 166 |  | 7.07 | 6.52 |  | 1.11 |  |  |
| 169 |  | 13.96 | 5.15 |  |  | 1.92 |  |
| 171 |  | 6.99 |  |  | 2.53 | 1.36 |  |
| **172** |  | **49.06** | **8.29** |  | **7.22** | **6.03** |  |
| **173** |  | **16.21** | **1.33** |  | **4.43** |  |  |
| **175** |  | **21.57** | **8.67** |  | **4.71** | **3.63** |  |
| 176 |  | 6.36 | 1.34 |  | 4.34 |  |  |
| 177 |  | 6.53 |  |  |  |  |  |

**Supplementary Table 7**. Different types of bond order results for [CeCSc2]6+ cluster in CeCSc2@C80.

| Bond | PBE/TZ2P+DZP | | | | B3LYP/6-31G*+SDD | | |
| --- | --- | --- | --- | --- | --- | --- | --- |
| Distance/Å | Mayer | G-J | N-M(3) | Distance /Å | WBI | NRT*a* |
| C–Ce | 2.08 | 1.50 | 1.74 | 1.99 | 2.05 | 1.84 | 2.73 (1.49) |
| C–Sc1 | 2.00 | 0.83 | 0.92 | 1.00 | 2.01 | 0.56 | 0.51 (0.45) |
| C–Sc2 | 2.00 | 0.83 | 0.92 | 1.00 | 2.01 | 0.56 | 0.55 (0.48) |

*a* Ionic contributions are in parentheses.

**Supplementary Table 8.** The experimental bond length *R*(Å), electron density *ρ*, Laplace electron density ∇2*ρ*, electron energy density *H* (*H* = kinetic energy density *G* + potential energy density *V*), eta index *η*, ellipticity *ε* and delocalization index DI (all are atomic unit) of Ce≡C bond in CeCSc2@C80 from the QTAIM analysis at B3LYP/6-31G*+SDD and other reported Ce–C bonds.

|  | *R* | *ρ* | ∇2*ρ* | *G* | *V* | *H* | *η* | ε | DI |
| --- | --- | --- | --- | --- | --- | --- | --- | --- | --- |
| **CeCSc2@C80** | **1.978** | **0.160** | **0.078** | **0.111** | **-0.202** | **-0.091** | **0.44** | **0.12** | **1.55** |
| Ce(BIPMTMS)2 15 | 2.385  2.399 | 0.086  0.086 | / | / | / | / | / | 0.40  0.41 | 0.62  0.61 |
| Ce(BIPMTMS)(ODipp)2 12 | 2.442 | 0.074 | 0.155 | 0.046 | −0.054 | −0.008 | / | 0.32 | / |
| [BrCe(CDP)2]2+ 52 | 2.574  2.597 | 0.062  0.062 | 0.095  0.097 | 0.038  0.038 | −0.052  −0.053 | −0.014  −0.015 | / | 0.19  0.18 | / |
| Br3Ce(CDP)(THF)52 | 2.597 | 0.057 | 0.097 | 0.035 | −0.045 | −0.010 | / | 0.11 | / |

**Supplementary Table 9.** Energy decomposition analysis of CeCSc2@C80 by using singlet [CeCSC2]6+ and [C80]6− as interacting fragment at the PBE/TZ2P+DZP level. Energy values are given in kcal/mol. The value in parentheses gives the percentage contribution to the total attractive interactions ΔEelstat + ΔEorb.

| Fragment | [CeCSc2]6+ (singlet)  [C80]6− (singlet) |
| --- | --- |
| ΔEint | −3056.95 |
| ΔEPauli | 518.79 |
| ΔEelstat | −2432.08 (68.0%) |
| ΔEorb | −1143.67 (32.0%) |

**Supplementary Table 10.** Optimization results of different molecules at B3LYP/6-31G+SDD level.

| Molecular | CeCSc2@C80 | ECP46*a* | **1*b*** | **2*b*** | **3*b*** | **4*b*** |
| --- | --- | --- | --- | --- | --- | --- |
| RCe**–**C/Å | 2.049 | 2.112 | 1.992 | 1.968 | 2.077 | 2.084 |
| RSc–C/Å | 2.015  2.016 | 1.997  1.997 | 2.201  2.095 | 2.170  2.128 | 2.115  2.113 | 2.111  2.111 |
| Sc1–C–Sc2–Ce/° | 176.9 | 179.68 | 165.9 | 173.2 | 179.9 | 179.9 |

*a*In the optimization of CeCSc2@C80, the pseudopotential used for Ce is ECP46MWB with its corresponding valence basis; *b*(C5H5)CeC[Sc1(C7H7)][Sc2(C8H8)] (**1**), (C5H5)CeC[Sc(C8H8)]2+ (**2**), (C8H8)CeC[Sc(C8H8)]2 (**3**), and (C5H5)2CeC[Sc(C8H8)]2 (**4**), respectively.

**Supplementary Table 11.** Different atomic charge analyses of CeCSc2@C80 at PBE/TZ2P+DZP level. Charge analyses include Hirshfeld charge, Voronoi deformation density (VDD) charges, multipole-derived charges reconstructed up to quadrupoles (MDC-q), and Mulliken charge.

| Atom | Hirshfeld | VDD | MDC-q | Mulliken |
| --- | --- | --- | --- | --- |
| Ce | 0.48 | 0.33 | 1.22 | 4.02 |
| C | -0.55 | -0.70 | -0.92 | -1.14 |
| Sc1 | 0.42 | 0.42 | 0.95 | 2.28 |
| Sc2 | 0.42 | 0.42 | 0.95 | 2.28 |

**Supplementary Table 12.** The atomic orbital overlap integrals of Ce or Sc atom and C atom in M-C diatoms at the experimental bond lengths (Ce–C = 1.98 Å; Sc–C = 2.00 Å)*a,b*.

| Atoms (distance from carbon) | Atomic orbitals | C 2s | C 2pz | C 2px | C 2py |
| --- | --- | --- | --- | --- | --- |
| Ce (1.98 Å) | 4fz3 | 0.082 | 0.042 |  |  |
| 4fz2x |  |  | 0.091 |  |
| 4fz2y |  |  |  | 0.091 |
| 5dz2 | 0.396 | 0.092 |  |  |
| 5dzx |  |  | 0.352 |  |
| 5dzy |  |  |  | 0.352 |
| Sc (2.00 Å) | 3dz2 | 0.260 | 0.105 |  |  |
| 3dzx |  |  | 0.225 |  |
| 3dzy |  |  |  | 0.225 |

*a*The M-C bond axis is used as the z-direction. For Ce-C =1.98 Å, the s-orbital overlap integrals <4fz3|2s> : <5dz2|2s> = 20.7% ~ 1/5; <4fz3|2pz> : <5dz2|2pz > = 45.7% ~ 2/5; The p-orbital overlap integrals <4fz2x|2px> : <5dxz|2px > = 26.0% ~ 1/4. *b*The calculated Mulliken bond order is 0.24 for Ce4f-C2s/2p and 0.55 for Ce5d-C2s/2p.
